# Supplementary material for: The acquisition of molecular drivers in pediatric therapy-related myeloid neoplasms
Source: PubMed Central journal article supplement (PMC7880998; doi:10.1038/s41467-021-21255-8), 2021-02-12
Supplement: 41467_2021_21255_MOESM3_ESM.pdf [file 41467_2021_21255_MOESM3_ESM.pdf]

## **Description of Additional Supplementary Files**

File Name: Supplementary Data 1

Description: Clinical Data of the pediatric tMN cohort

File Name: Supplementary Data 2

Description: Rank-sum p-values for age for each molecular group, this data complements that of Supplementary Figure 1a & b.

File Name: Supplementary Data 3

Description: Rank-sum p-values for time-to-tMN for each molecular group, this data complements that of Supplementary Figure 1c & d.

File Name: Supplementary Data 4

Description: Complete list of somatic variants present in tumor/normal sub-cohort (n=62).

File Name: Supplementary Data 5

Description: Gene list for Twist panel used for variant validation via targeted sequencing.

File Name: Supplementary Data 6

Description: WGS QC data

File Name: Supplementary Data 7

Description: WGS QC data

File Name: Supplementary Data 8

Description: Targeted sequencing (TWIST) QC data

File Name: Supplementary Data 9

Description: Listing of DNA repair gene mutations present in the 4 cases with a hypermutated phenotype. Complements that of Supplementary Figure 2a.

File Name: Supplementary Data 10

Description: GRIN analysis

File Name: Supplementary Data 11

Description: Gene list categorized into functional class used for preparing Figure 1c.

File Name: Supplementary Data 12

Description: Complete list of germline variants present in the pediatric tMN cohort.

File Name: Supplementary Data 13

Description: Clinical & therapy data for patient's with P/LP germline variants

File Name: Supplementary Data 14

Description: Gene list used for germline variant determination.

File Name: Supplementary Data 15

Description: List of germline variants determined to be mosaic.

File Name: Supplementary Data 16

Description: Complete list of copy number alterations found in the tumor/normal sub-cohort (n=62).

File Name: Supplementary Data 17

Description: Type and dose of chemotherapy agents used for treatment of the primary malignancy for each case.

File Name: Supplementary Data 18

Description: Complete list of structural variants identified via RNASeq in the tumor/normal sub-cohort (n=62).

File Name: Supplementary Data 19

Description: RNASeq QC data

File Name: Supplementary Data 20

Description: Listing of primers used for RT-PCR fusion validation. This data complements Supplementary Figure 9.

File Name: Supplementary Data 21

Description: Read counts of all variants at each time point cases used to describe clonal evolution.

File Name: Supplementary Data 22

Description: Ultra-deep amplicon sequencing of TP53 in cases with TP53 variants and the determination of tumor in normal contamination or mosaicism. This data complements Supplementary Figure 17.
